# Supplementary material for: The transcription factor complex LMO2/TAL1 regulates branching and endothelial cell migration in sprouting angiogenesis
Source: PubMed Central journal article supplement (PMC9068620; doi:10.1038/s41598-022-11297-3), 2022-05-04
Supplement: 41598_2022_11297_MOESM2_ESM.pdf [file 41598_2022_11297_MOESM2_ESM.pdf]

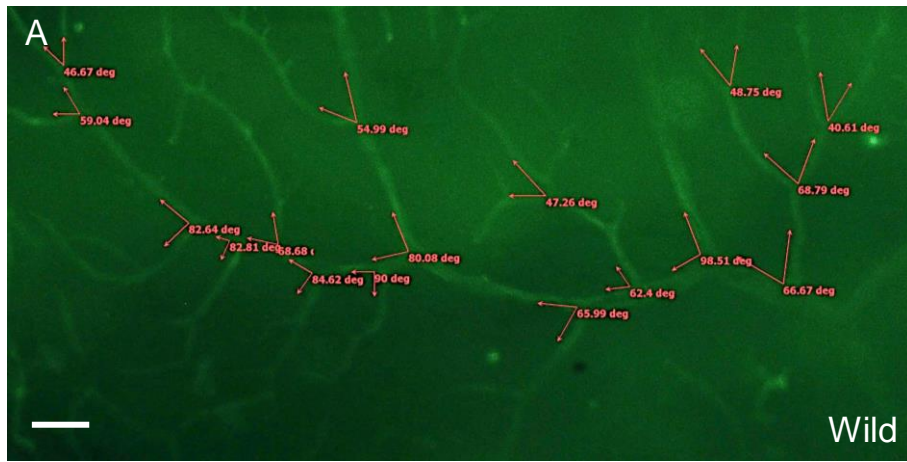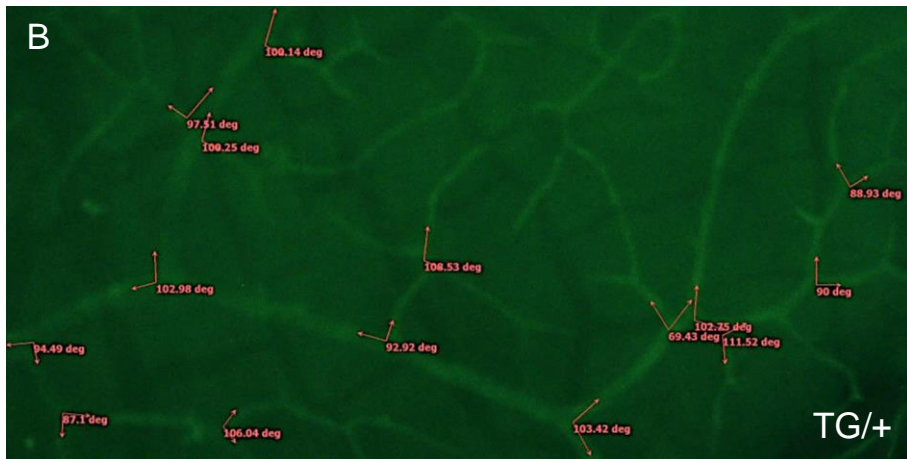

C

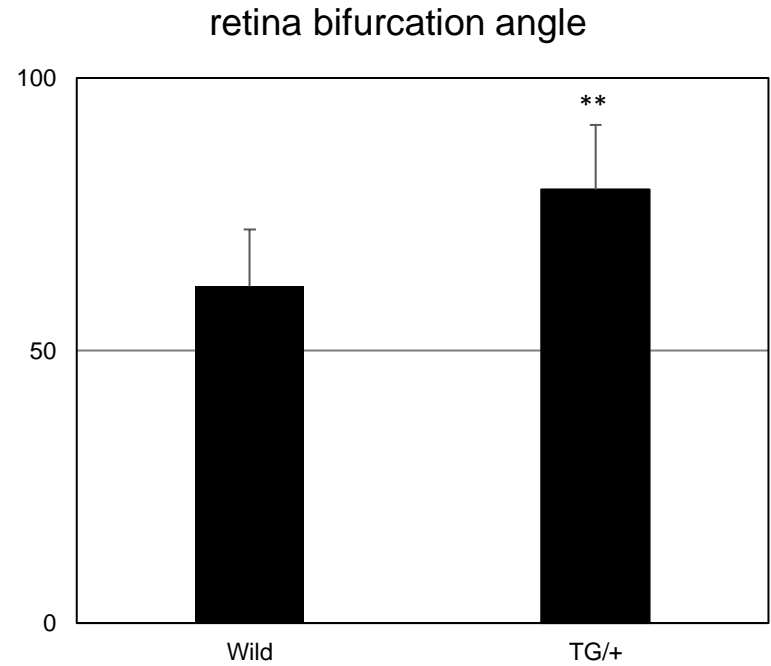

### Supplemental Figure 2. Bifurcation angle analysis of 11-week-old mouse retina blood vessel

TG/+ blood vessels (B) showed wider branching angles typical of those at the 11-week-old mouse retina stained with Alexa-Flour 488 Isolectin IB4 compared with those from wild type littermates (A) (\*\* $P < 0.01$ , wild  $n = 66$ , TG/+  $n = 55$ ). C. Statistical analysis of bifurcation angle. The vertical axis represents the angle (degrees). Bar = 50  $\mu$ m
