# Supplementary material for: The transcription factor complex LMO2/TAL1 regulates branching and endothelial cell migration in sprouting angiogenesis
Source: PubMed Central journal article supplement (PMC9068620; doi:10.1038/s41598-022-11297-3), 2022-05-04
Supplement: 41598_2022_11297_MOESM3_ESM.pdf [file 41598_2022_11297_MOESM3_ESM.pdf]

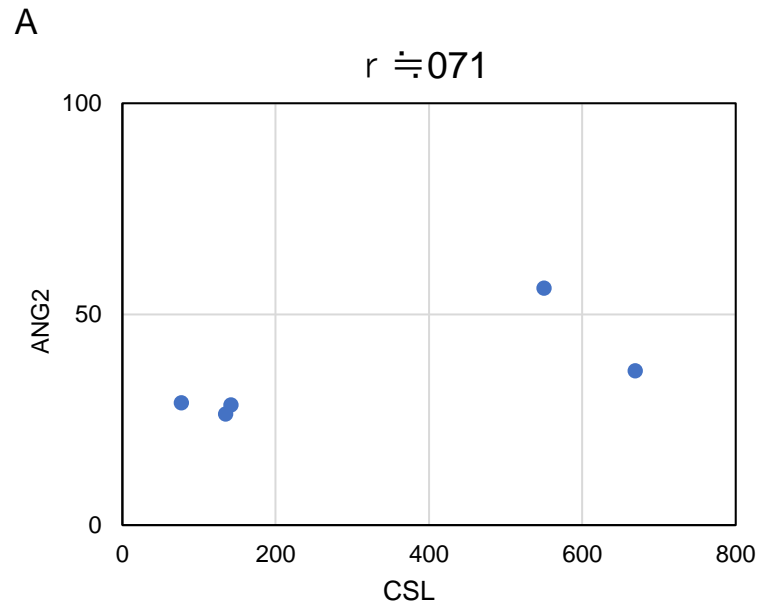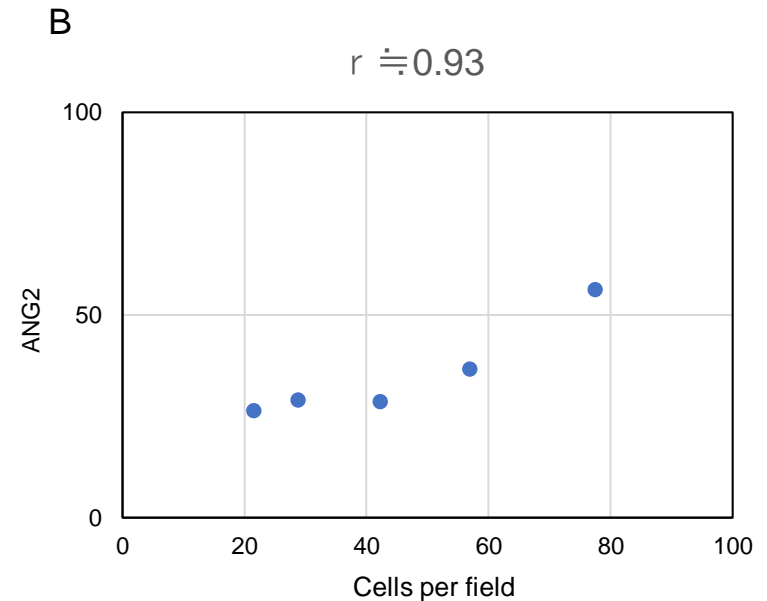

**Supplemental Figure 3. Correlation between secreted angiopoietin 2 level and endothelial migration**

Angiopoietin 2 levels in the supernatant showed a strong correlation with CSL in spheroids treated with each siRNA (correlation coefficient:  $r = 0.71$ ) (A) and number of cells per field in endothelial cell invasion assay of HUVEC treated with each siRNA ( $r = 0.92$ )(B).
