# Supplementary material for: The transcription factor complex LMO2/TAL1 regulates branching and endothelial cell migration in sprouting angiogenesis
Source: PubMed Central journal article supplement (PMC9068620; doi:10.1038/s41598-022-11297-3), 2022-05-04
Supplement: 41598_2022_11297_MOESM5_ESM.pdf [file 41598_2022_11297_MOESM5_ESM.pdf]

## Supplemental table

### Primers for real-time qPCR

|        | Forward                 | Reverse                 |
|--------|-------------------------|-------------------------|
| GAPDH  | ACACCCACTCCTCCACCTTT    | TCCACCACCCTGTTGCTGTA    |
| LMO2   | TACTTCCTGAAGGCCATC      | CCTGAGATAGTCTCTCCG      |
| TAL1   | CTCGGCAGCGGGTTCTTTGG    | CTCCATCTCATAGGGGGAAG    |
| LYL1   | CATCTTCCCTAGCAGCCGGTTG  | GTTGGTGAACACGCGCCG      |
| GATA2  | ATCCAGACTCGGAACCGGAAG   | GCACTTTGACAGCTCCTCGAAG  |
| VEcadh | CGCCTCTGTCATGTACCAAA    | GTCTTCAGGCACGACAAATG    |
| NRP2   | CTGTGGGTCATCCGTGAGGAC   | ATGGGTTCCATGCAGTTCTCCAG |
| NRP1   | ACACCTGAGCTGCGGACTTT    | GGCCTGGTCGTCATCACAT     |
| VEGFR1 | CTGTCATGCTAATGGTGTCCC   | TGCTGCTTCCTGGTCCTAAAATA |
| VEGFR2 | CACCACTCAAACGCTGACATGTA | CCAAGTCCAATACCAGTGGA    |
| VEGFR3 | CAAGGCCAACAACGGCAT      | TCGACGCTGATGAAGGGA      |
| HPRT1  | GGTGAAAAGGACCCACGAA     | GTATTCATTATAGTCAAGGGC   |
